# Supplementary material
Source: PubMed Central journal article supplement (PMC3088989)
Supplement: NIHMS279329-supplement-1.pdf [file NIHMS279329-supplement-1.pdf]

Pei et al. Supplementary Figure S8

A

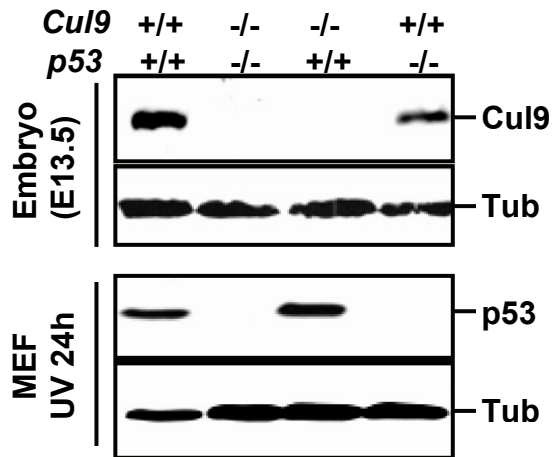

B

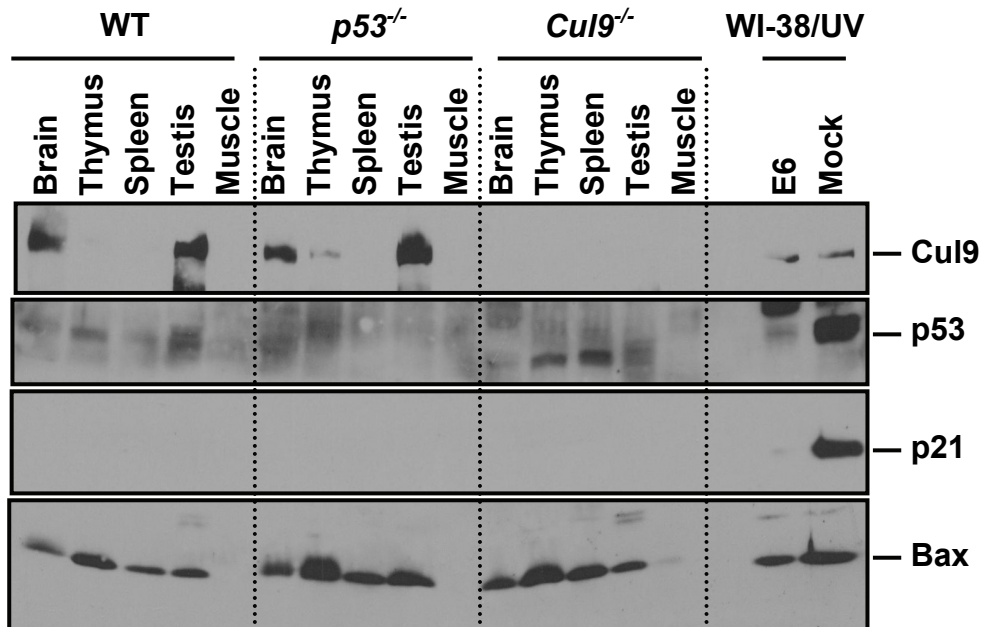

**Supplementary Figure S8. Deletion of *p53* does not significantly affect *Cul9* expression.**

**A.** Whole cell lysates were prepared from E13.5 mouse embryos (top panel) or UV-irradiated MEFs (lower panel) of indicated genotype and separated by SDS-PAGE, followed by western blotting using indicated antibodies.

**B.** Whole cell lysates from different tissues or organs of mice of indicated genotype at 7-8 week of age and separated by SDS-PAGE, followed by western blotting using indicated antibodies. Human WI-38 cells transfected with or without E6 were UV irradiated were included as a positive control for p53 and p21 protein expression. Loss of *p53* in embryo slightly decreases *Cul9* protein level and deletion of *p53* in adult tissue does not affect *Cul9* expression.
