# Supplementary material
Source: PubMed Central journal article supplement (PMC3088989)
Supplement: NIHMS279329-supplement-4.pdf [file NIHMS279329-supplement-4.pdf]

Pei et al. Supplementary Figure S3

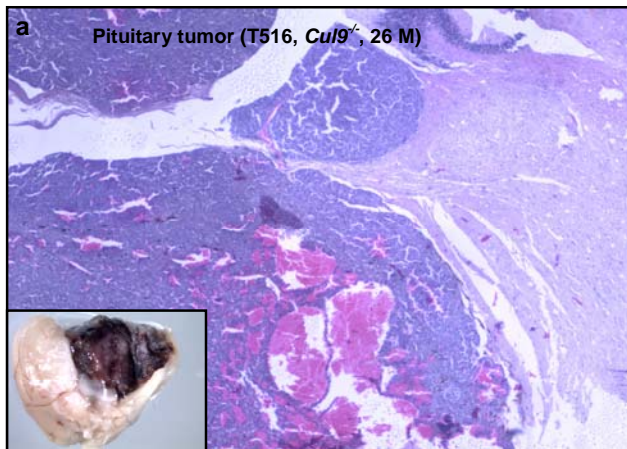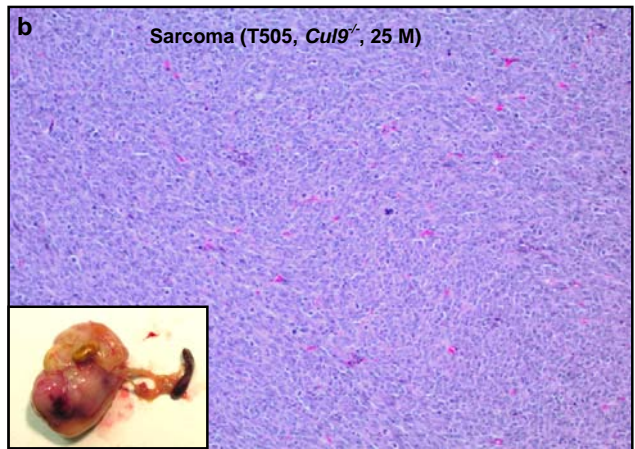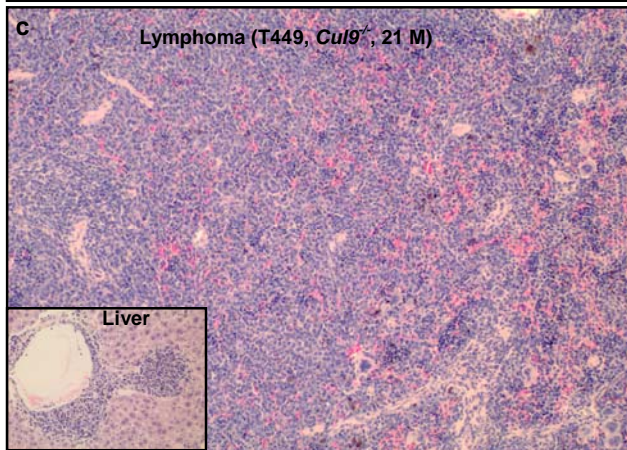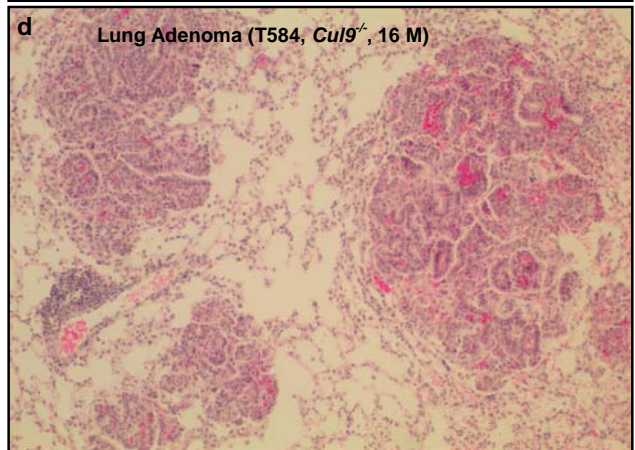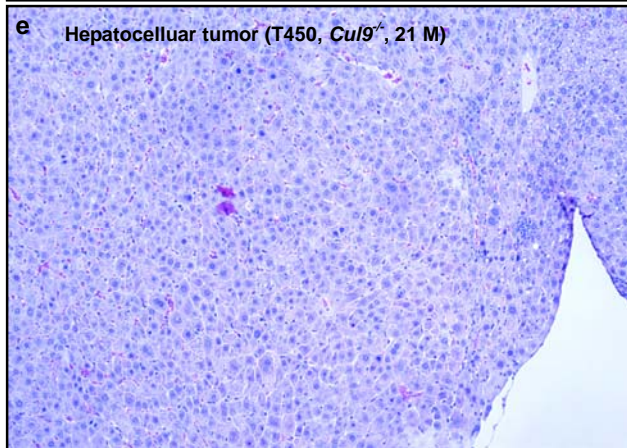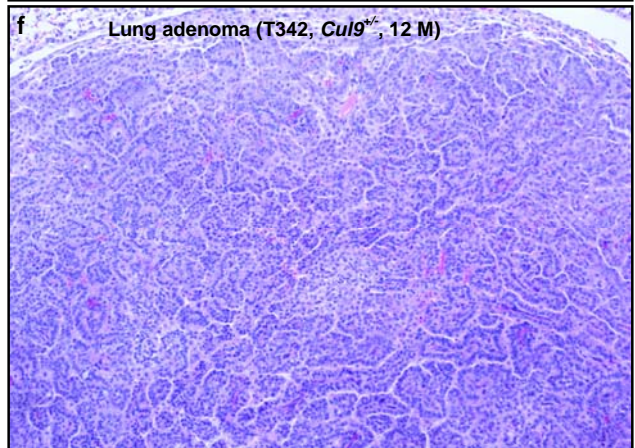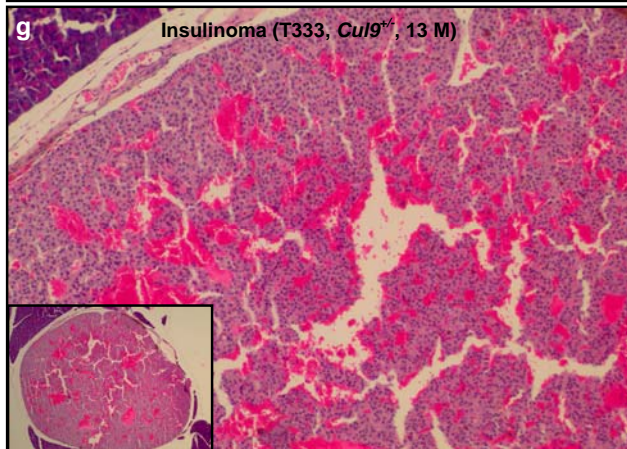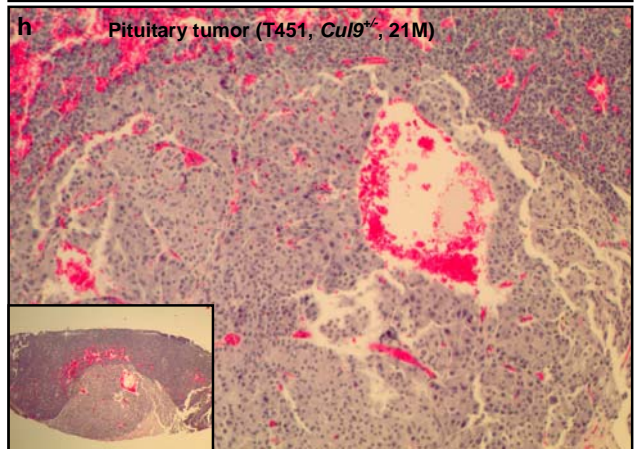

**Supplementary Figure S3. Representative tumors developed in *Cu/9* mutant mice.**

Insets in a and b showing the gross picture of the tumors, in c showing the liver periportal invasion of lymphoma, and in g and h showing the lower magnification picture of the tumors. M, month.
