# Supplementary material
Source: PubMed Central journal article supplement (PMC3088989)
Supplement: NIHMS279329-supplement-5.pdf [file NIHMS279329-supplement-5.pdf]

Pei et al. Supplementary Figure S4

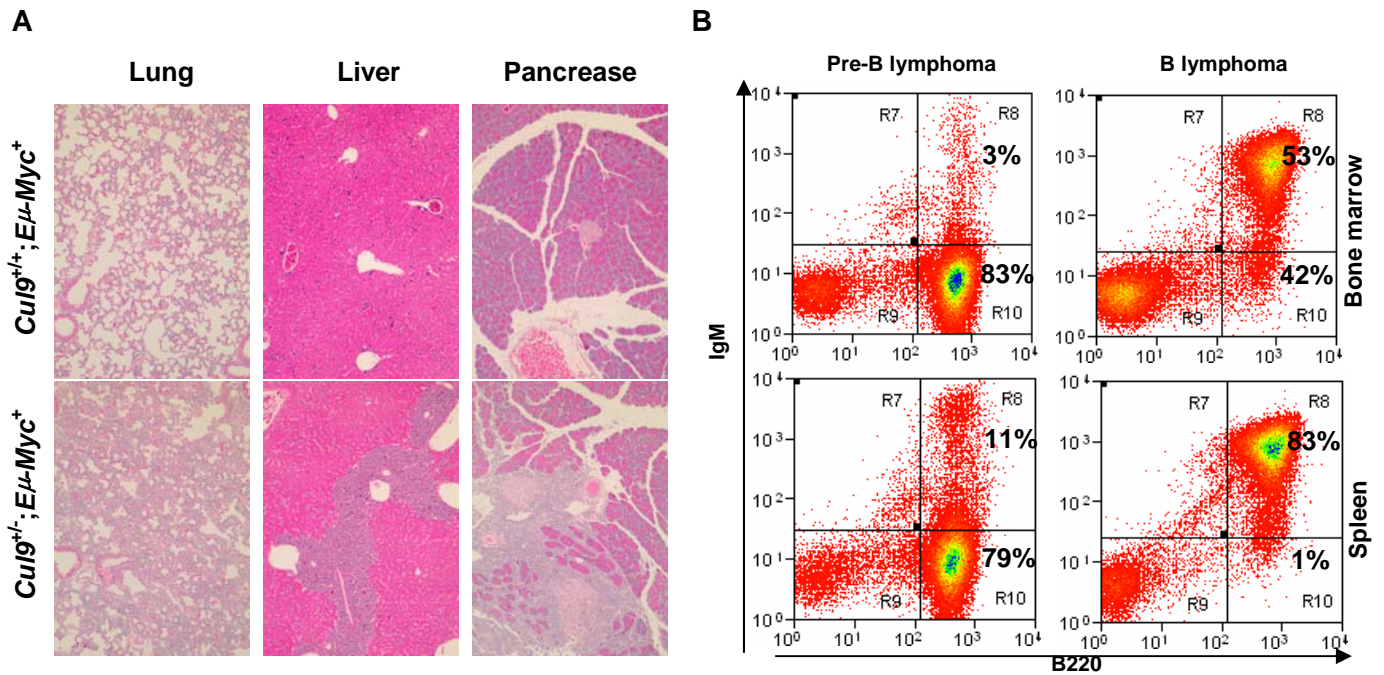

**Supplementary Figure S4. *Cul9* deficiency accelerates Eμ-Myc-induced lymphomagenesis.**

**A.** H.E. staining of representative lymphoma developed in 3 month old mice, illustrating lymphoma invasion into lung, liver and pancreases in a *Cul9<sup>+/-</sup>;Eμ-Myc<sup>+</sup>* mouse.

**B.** FACS analysis of representative pre-B and B lymphomas. Bone marrow or spleen cells prepared from two representative mice at two months of age were stained with B220 and IgM. The expression of B220+IgM<sup>low</sup> and B220+IgM<sup>high</sup> confirmed the origin of tumors as pre-B lymphoma and B lymphoma, respectively.
